# Supplementary material for: Perceived facilitators and barriers among physical therapists and orthopedic surgeons to pre-operative home-based exercise with one exercise-only in patients eligible for knee replacement: A qualitative interview study nested in the QUADX-1 trial
Source: PLOS journal article supplement (doi:10.1371/journal.pone.0241175), 2020-10-23
Supplement: S2 (10.1371/journal.pone.0241175.s002) [file journal.pone.0241175.s002]

## Interview guide physiotherapists

### Therapist information

Age

Municipality

### 1. The role of the physiotherapist in this type of exercise therapy intervention (exercise instruction followed by home-based exercise)

- a. What kind of role do you think you will have in this type of physiotherapy?
  - i. Advantages, disadvantages or possibilities?
- b. Reflect on how this home-based/self-management approach is different from your current treatment of these patients.
  - i. Advantages, disadvantages or possibilities? Time?

#### Supplementary questions if topics not discussed from the above

- c. Do you experience that you lose professionalism when instructing patients and send them home compared to supervising their treatment (exercise) and the quality of the treatment?
  - i. Advantages and/or disadvantages of this un-supervised type of physiotherapy?
- d. Can more time be allocated to patients with higher need when patients with knee osteoarthritis exercise at home?
- e. Does this approach change your role in relation to motivating patients to exercise?
  - i. E.g. adherence to home-based exercise/"sell the idea" (pedagogy)?
  - ii. Does this role acquire other skills from you? If so, which?

### 2. Pre-operative exercise

- a. Which possibilities or barriers do you see in relation to exercise therapy in patients with end-stage knee osteoarthritis?
  - i. Advantages and disadvantages for both physiotherapists and patients?

### 3. Non-supervised exercise therapy

- a. Which possibilities and barriers do you see in relation to non-supervised exercise therapy?
  - i. Advantages, disadvantages why?
- b. To what extent do you think that the patients can get the same quality in the exercise therapy when you are not there to supervise them?
  - i. Why, why not?

#### Supplementary questions if topics not discussed from the above

- c. Are the patients able to adhere to the pre-scribed exercise dosage when not supervised?  
Why, why not? Elaborate.
- d. Are the patients able to exercise with the same quality non-supervised as supervised?
  - i. Why, why not? Elaborate.

### 4. One-exercise exercise therapy

- a. Reflect on the rehabilitation approach with *one* exercise. How does this deviate your current practice?
  - i. Advantages, disadvantages to this approach?
- b. Reflect on the effect of exercise therapy with *one* exercise. What does it require to achieve effect?

- i. Why?
- c. What do you think the patient's thoughts are on this?
  - i. Why?

**5. The model of coordinated non-surgical and surgical treatment**

- a. What are your thoughts on the model where the coordination between municipality and hospital is initiated before potential surgery?
  - i. Which advantages, disadvantages or possibilities do you see in the model? Both to yourselves and for the patients?
- b. Is the model of coordinated non-surgical and surgical treatment applicable to your daily clinical practice?
  - i. If not, what would need to be changed for it to be applied?
- c. What are your thoughts on the model of coordinated non-surgical and surgical treatment on an organizational level?
  - i. Advantages, disadvantages or possibilities? Is it implementable?

**6. Other**

- a. Topics we have not discussed which you would like to comment on?
